# Supplementary material
Source: PubMed Central journal article supplement (PMC3447107)

**Meso 6**

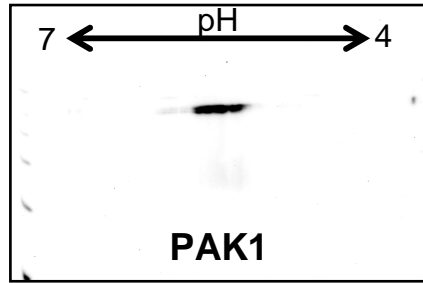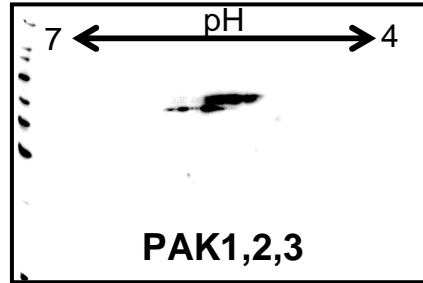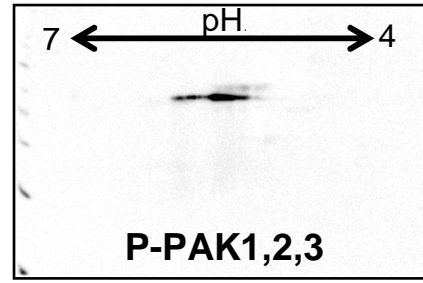

**Meso 22**

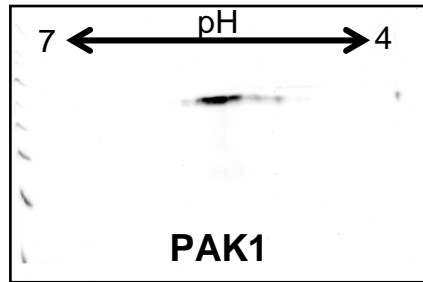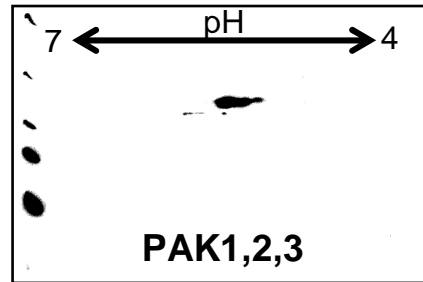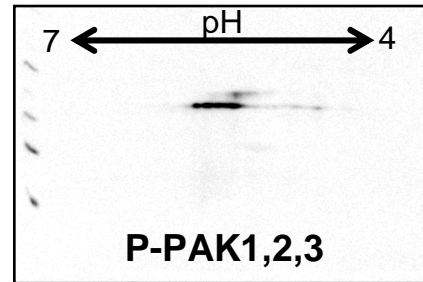

**Meso 32**

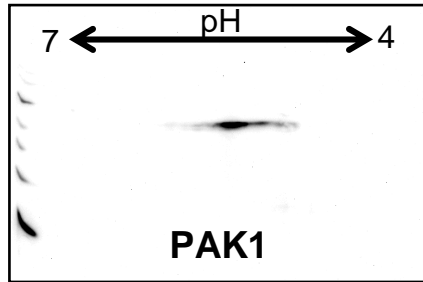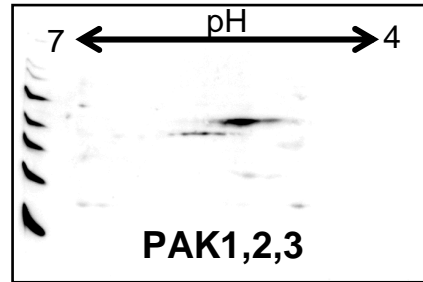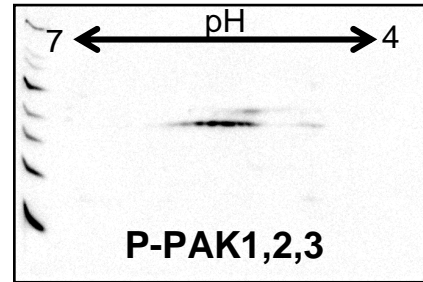

**H-Meso**

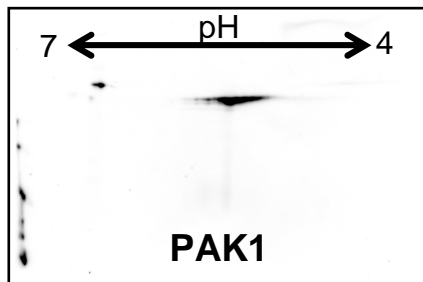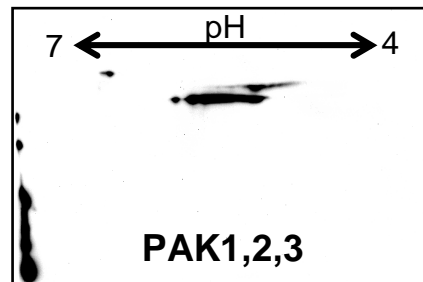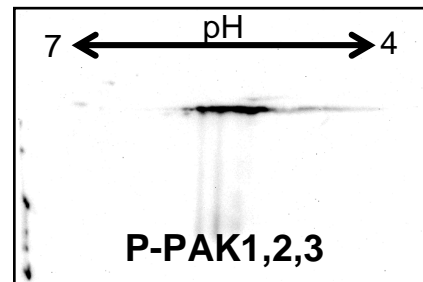

Supplement: NIHMS394501-supplement-2.pdf [file NIHMS394501-supplement-2.pdf]

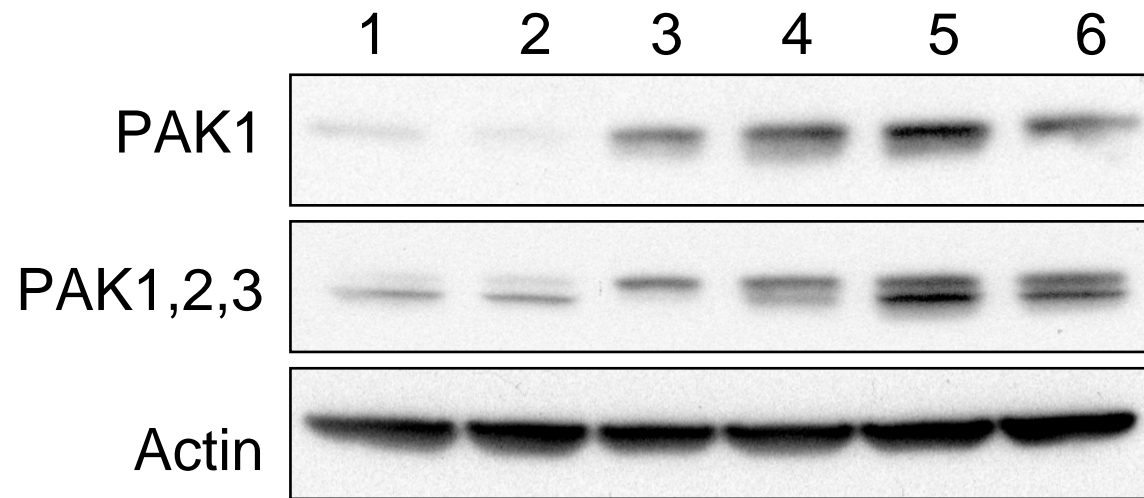

1. siRNA PAK1 #1
2. siRNA PAK1 #2
3. siRNA PAK2 #1
4. siRNA PAK2 #2
5. siRNA Non-Target
6. Normal Control

Supplement: NIHMS394501-supplement-3.pdf [file NIHMS394501-supplement-3.pdf]

No Treatment

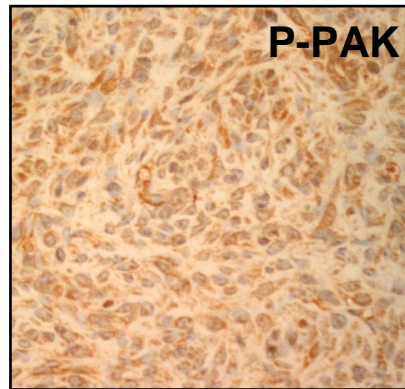

$\lambda$ PPtase

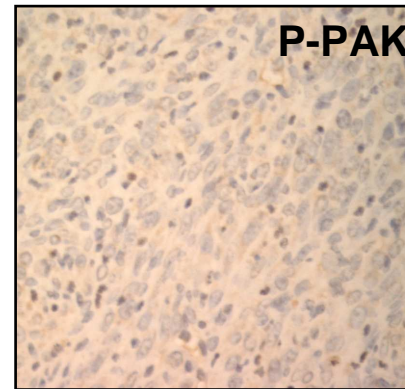

Supplement: NIHMS394501-supplement-4.pdf [file NIHMS394501-supplement-4.pdf]

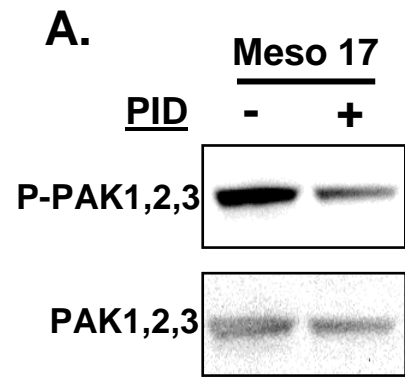

**B.**

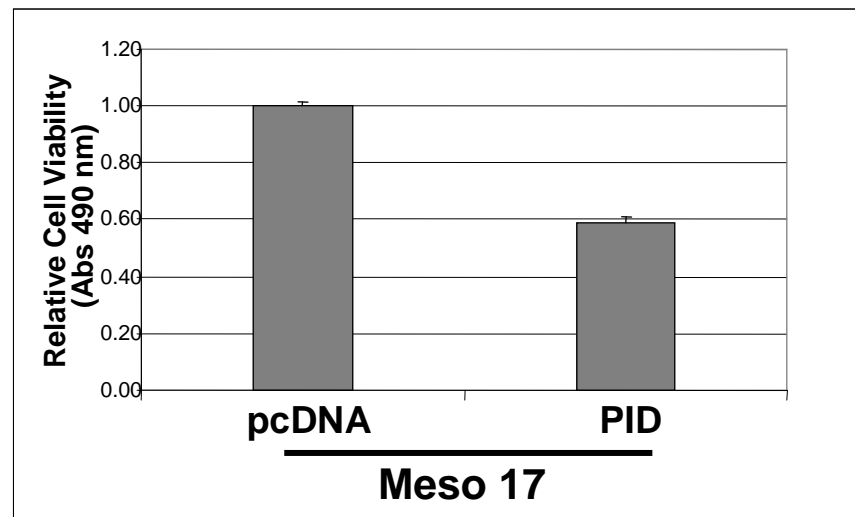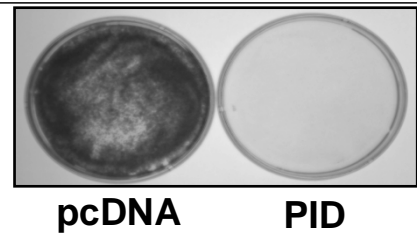

Supplement: NIHMS394501-supplement-5.pdf [file NIHMS394501-supplement-5.pdf]

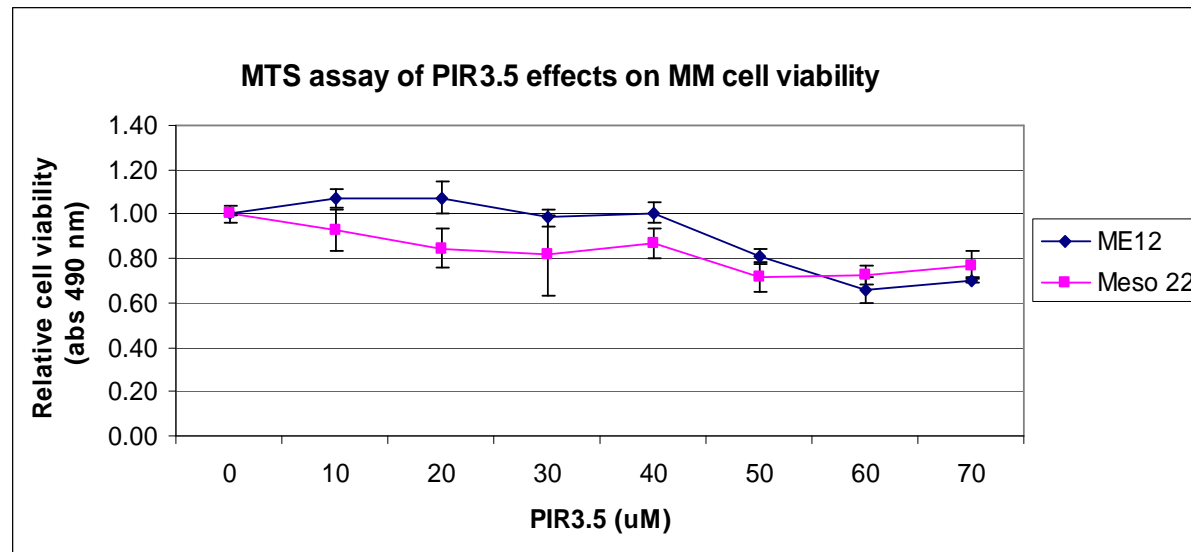

Supplement: NIHMS394501-supplement-6.pdf [file NIHMS394501-supplement-6.pdf]

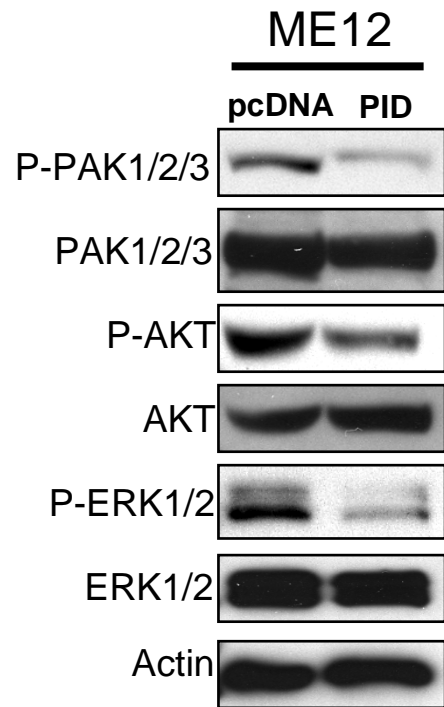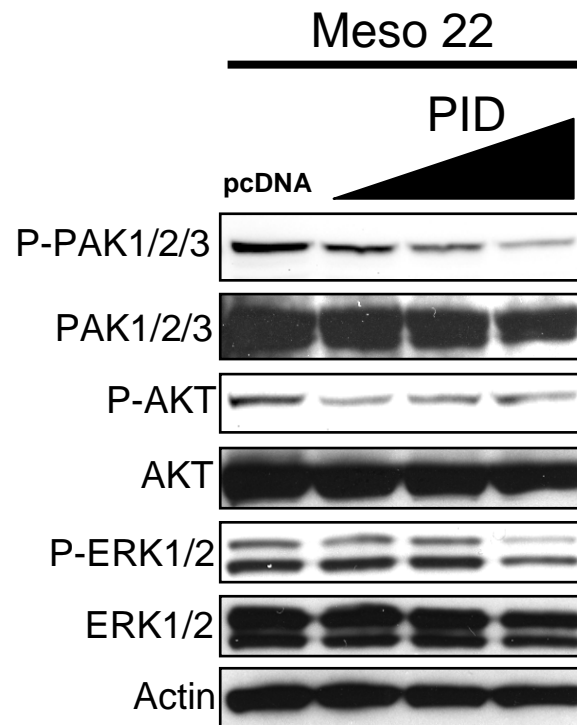

Supplement: NIHMS394501-supplement-7.pdf [file NIHMS394501-supplement-7.pdf]

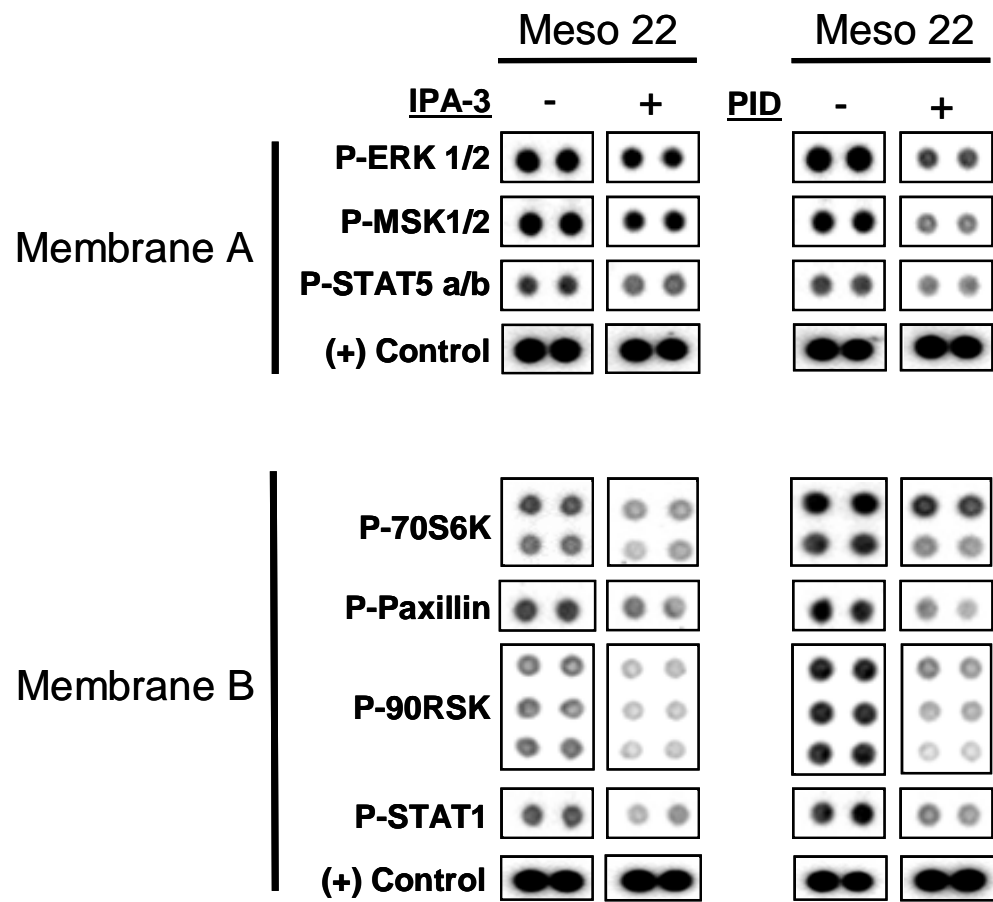

Supplement: NIHMS394501-supplement-8.pdf [file NIHMS394501-supplement-8.pdf]
